# Supplementary material for: Runx2 activates PI3K/Akt signaling via mTORC2 regulation in invasive breast cancer cells
Source: PubMed Central journal article supplement (PMC3979058; doi:10.1186/bcr3611), 2014-01-30

# Chondrocytes

Negative control (mIgG)

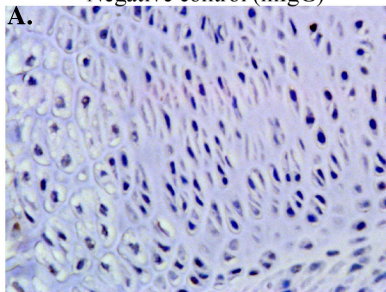

anti-Runx2

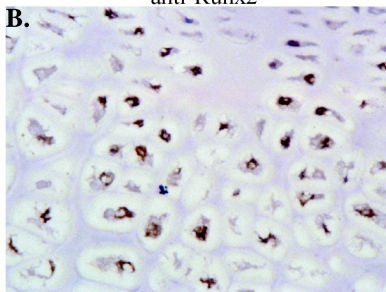

# Invasive breast cancers

Negative control (rIgG)

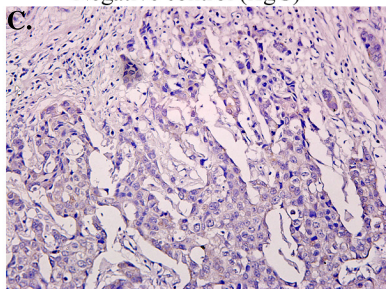

pAkt (Ser 473)

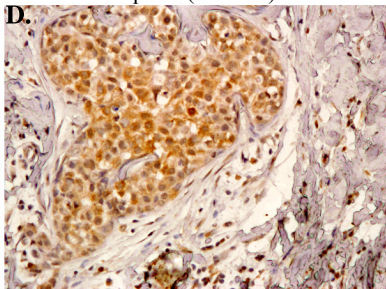

Runx2

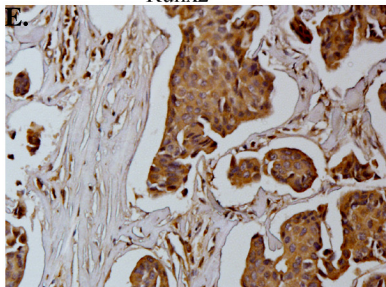

**F.**

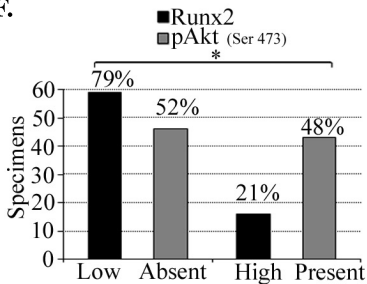

Supplement: bcr3611-S2.pdf [file bcr3611-S2.pdf]
