# Supplementary material for: Runx2 activates PI3K/Akt signaling via mTORC2 regulation in invasive breast cancer cells
Source: PubMed Central journal article supplement (PMC3979058; doi:10.1186/bcr3611), 2014-01-30

## MCF-7

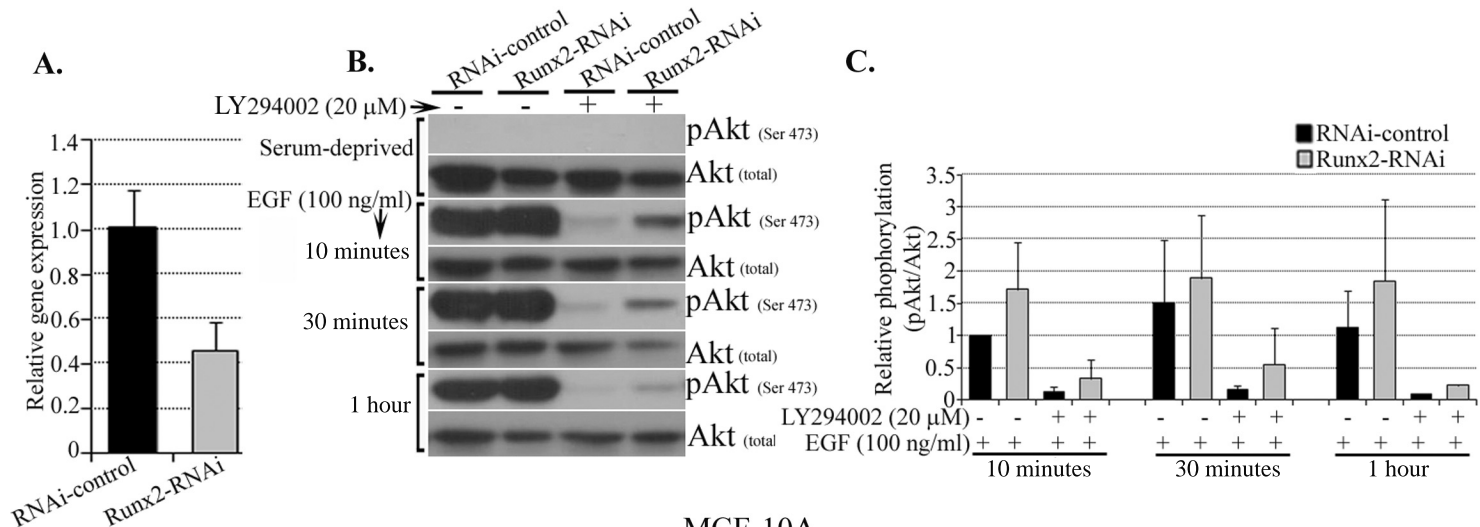

## MCF-10A

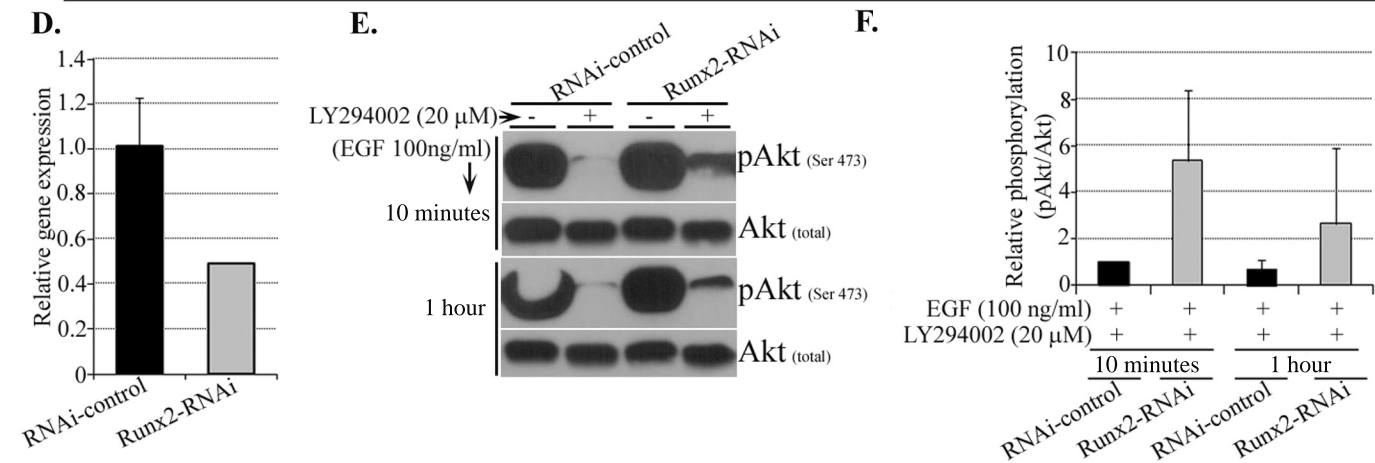

Supplement: bcr3611-S4.pdf [file bcr3611-S4.pdf]
