# Supplementary material for: Runx2 activates PI3K/Akt signaling via mTORC2 regulation in invasive breast cancer cells
Source: PubMed Central journal article supplement (PMC3979058; doi:10.1186/bcr3611), 2014-01-30

## MDA-MB-231

(pLV-tTR-KRAB)

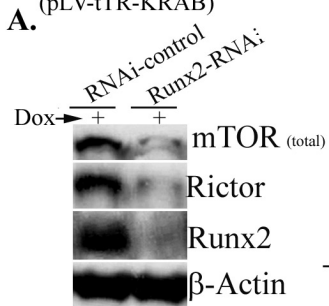

## SUM-159-PT

**B.**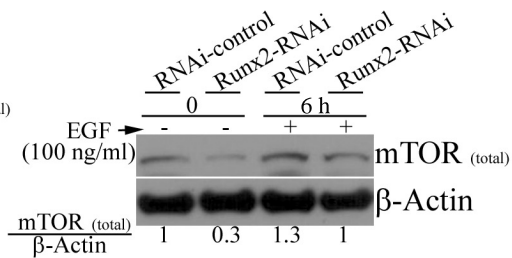**C.**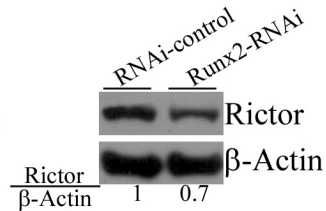**D.**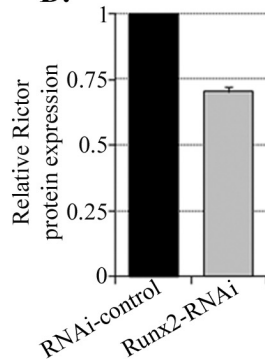

Supplement: bcr3611-S5.pdf [file bcr3611-S5.pdf]
